1 ***Allele-specific* knockouts reveal a role for *apontic-like* in the**  
2 **evolutionary loss of larval pigmentation in the domesticated**  
3 **silkworm, *Bombyx mori***

4  
5 Kenta Tomihara<sup>1\*</sup>, Peter Andolfatto<sup>2</sup>, Takashi Kiuchi<sup>1\*</sup>

6  
7 <sup>1</sup>Graduate School of Agricultural and Life Sciences, The University of Tokyo, Yayoi,  
8 Bunkyo-ku, Tokyo 113-8657, Japan

9 <sup>2</sup>Department of Biological Sciences, Columbia University, New York, NY 10026, USA

10

11 \*Corresponding Author:

12 Kenta Tomihara: [tomihara@g.ecc.u-tokyo.ac.jp](mailto:tomihara@g.ecc.u-tokyo.ac.jp)

13 Takashi Kiuchi: [kiuchi@g.ecc.u-tokyo.ac.jp](mailto:kiuchi@g.ecc.u-tokyo.ac.jp)

14

15 **Running title:** Genome editing in *Bombyx mandarina*

16

17 **Abstract**

18 The domesticated silkworm, *Bombyx mori*, and its wild progenitor, *B. mandarina*, are  
19 extensively studied as a model case of the evolutionary process of domestication. A  
20 conspicuous difference between these species is the dramatic reduction in pigmentation  
21 in both larval and adult *B. mori*. Here we evaluate the efficiency of CRISPR/Cas9-  
22 targeted knockouts of pigment-related genes as a tool to understand their potential  
23 contributions to domestication-associated pigmentation loss in *B. mori*. To demonstrate  
24 the efficacy of targeted knockouts in *B. mandarina*, we generated a homozygous  
25 CRISPR/Cas9-targeted knockout of *yellow-y*. In *yellow-y* knockout mutants, black body  
26 color became lighter throughout the larval, pupal and adult stages, confirming a role for  
27 this gene in pigment formation. Further, we performed *allele-specific* CRISPR/Cas9-  
28 targeted knockouts of the pigment-related transcription factor, *apontic-like* (*apt-like*) in  
29 *B. mori* × *B. mandarina* F<sub>1</sub> hybrid individuals. Knockout of the *B. mandarina* allele of  
30 *apt-like* in F<sub>1</sub> embryos results in depigmented patches on the dorsal integument of larvae,  
31 whereas corresponding knockouts of the *B. mori* allele consistently exhibit normal F<sub>1</sub>  
32 larval pigmentation. These results demonstrate a contribution of *apt-like* to the evolution  
33 of reduced pigmentation in *B. mori*. Together, our results demonstrate the feasibility of  
34 CRISPR/Cas9-targeted knockouts as a tool for understanding the genetic basis of traits  
35 associated with *B. mori* domestication.

36

37 **Key words:** *Bombyx mandarina*, domestication, pigmentation, CRISPR/Cas9,  
38 reciprocal hemizyosity test.

39 **Brief abstract**

40 *Bombyx mori* and its wild progenitor are an important model for the study of phenotypic  
41 evolution associated with domestication. As proof-of-principle, we used CRISPR/Cas9  
42 to generate targeted knockouts of two pigmentation-related genes. By generating a  
43 homozygous knockout of *yellow-y* in *B. mandarina*, we confirmed this gene's role in  
44 pigment formation. Further, by generating *allele-specific* knockouts of *apontic-like* (*apt-*  
45 *like*) in *B. mori* × *B. mandarina* F<sub>1</sub> hybrids, we establish that evolution of *apt-like*  
46 contributed to reduced pigmentation during *B. mori* domestication.

47

48 **Graphical TOC/Abstract**

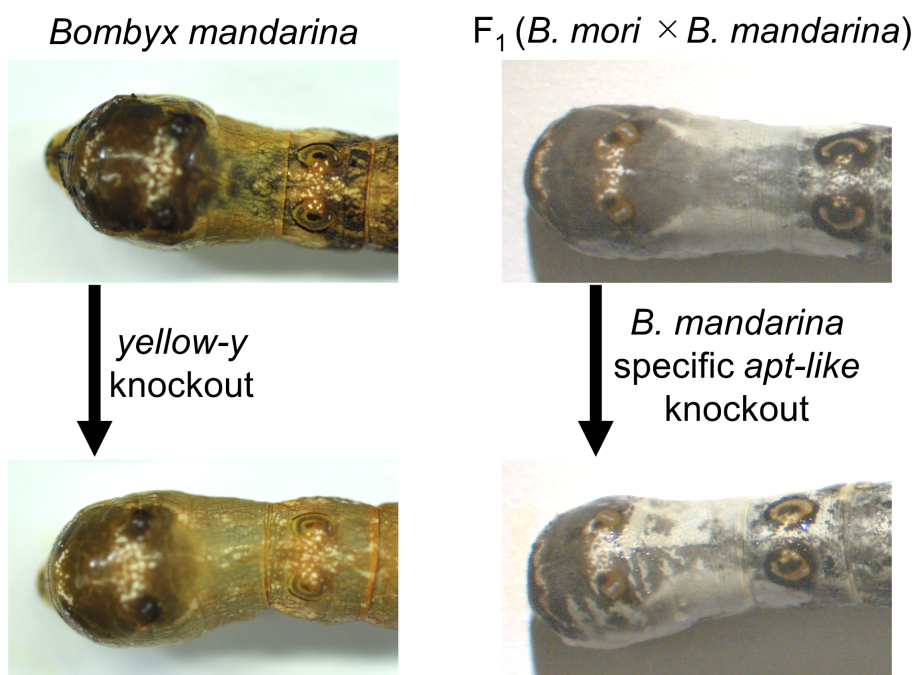

49

50

## 51 **Introduction**

52           The silkworm, *Bombyx mori*, was domesticated over 5000 years ago from its  
53 wild progenitor species, *B. mandarina*. Under long-term artificial selection, *B. mori*  
54 acquired various characteristics suitable for sericulture. For example, the weight of the  
55 cocoon shell of *B. mori* is much higher than that of *B. mandarina* (Ômura 1950, Li *et al.*  
56 2017, Fang *et al.* 2020). In addition, *B. mori* moths lost their flying ability due to the  
57 degeneration of their flight muscles and a reduction in wing stiffness (Lu *et al.* 2020).  
58 Among the most conspicuous domestication-associated traits is a marked reduction in  
59 pigmentation in *B. mori* larvae and adults relative to *B. mandarina* (Figure 1A).  
60 Curiously, depigmentation is a major trait contributing to the so-called “domestication  
61 syndrome” observed in a variety of domesticated animals, but for reasons that are not  
62 well-understood (Wilkins *et al.* 2014).

63           The genetic basis of pigmentation loss associated with *B. mori* domestication is  
64 not yet known. Previous studies reported that melanin synthesis pathway genes *tyrosine*  
65 *hydroxylase* (*TH*) and *aspartate decarboxylase* (*ADC*, also known as *black*) were  
66 potentially targets of selection during silkworm domestication (Yu *et al.* 2011, Xiang *et*  
67 *al.* 2018). Pigmentation patterning genes are also likely to be associated with the body  
68 color differences between *B. mori* and *B. mandarina*. The wild-type *B. mori* larvae are  
69 largely white but exhibit melanic spots (*i.e.* eye spots, crescent spots and star spots,  
70 Figure 1A). *B. mandarina* larvae, on the other hand, are substantially darker, and  
71 exhibit extensive dorsal pigment patterning that includes banding and spots (Figure 1A).



72           In *B. mori*, distinct alleles of the genetic locus, *p*, encode at least 15 different  
73 larval markings such as spots, stripes, and banding (Yoda *et al.* 2014). The gene  
74 underlying allelic variation at *p*, *apontic-like* (*apt-like*), encodes a transcription factor  
75 that is likely to regulate the expression of melanin synthesis pathway genes such as  
76 *yellow-y*, *ebony*, *TH*, *Dopa decarboxylase* (*DDC*) and *laccase 2* (Futahashi *et al.* 2008,  
77 Yoda *et al.* 2014) (Figure 1B). While *apt-like* has been implicated in pigmentation  
78 differences among *B. mori* strains, it's potential role in depigmentation of *B. mori* during  
79 domestication is not known. A hybrid strain (semiconsomic T02), in which chromosome  
80 2 of *B. mandarina* has been substituted into the genomic background of *B. mori*, exhibits  
81 a phenotype similar to that of the *B. mori* allele *moricaud* (*p<sup>M</sup>*) (Fujii *et al.* 2021). Since  
82 *apt-like* resides on chromosome 2, dorsal pigmentation patterning on the larvae of *B.*  
83 *mandarina* that is absent in *B. mori* was hypothesized to be controlled by the expression  
84 of *apt-like* (Yoda *et al.* 2014, Fujii *et al.* 2021), although direct evidence is lacking.

85           The genetic analysis of domestication-associated loss of pigmentation in *B.*  
86 *mori* has been challenging because deficiencies in candidate genes can result in lethality.  
87 For example, in the fruit fly, *Drosophila melanogaster*, *TH*-deficient (*pale*) mutants die  
88 at embryonic stage (Neckameyer and White 1993). In *B. mori*, *TH*-deficient mutants  
89 (*sch lethal*, *sch<sup>l</sup>*) and RNAi-mediated knockdowns of *TH* are both lethal at embryonic  
90 stage (Liu *et al.* 2010). In addition, *apt* mutants in *D. melanogaster* die at embryonic  
91 stage (Eulenberg and Schuh 1997, Gellon *et al.* 1997), and RNAi-mediated knockdown  
92 of *apt-like* in *B. mori* embryos results in death before hatching (Yoda *et al.* 2014).

93           The issue of lethality is likely to continue to impede the genetic analysis of  
94 pigmentation loss and other domestication-associated traits in *B. mori*. Recently, several  
95 candidate genes associated with domestication in *B. mori* have been identified using  
96 quantitative trait locus (QTL) mapping, including silk production (Li *et al.* 2017, Fang  
97 *et al.* 2020), larval climbing ability (Wang, Lin, *et al.* 2020), and mimicry (Wang, Lin,  
98 *et al.* 2020). In addition, a recent population genetic analysis identified 300 candidate  
99 genes as targets of recent selection in *B. mori*, some of which are likely to be associated  
100 with silk production and voltinism (Xiang *et al.* 2018). Despite these efforts, reverse  
101 genetic approaches such as targeted gene knockouts and editing (Takasu *et al.* 2010,  
102 2013, Wang *et al.* 2013), gene silencing (Quan *et al.* 2002), or transgenesis (Tamura *et*  
103 *al.* 2000) will likely be required to fully understand the function of these candidate genes  
104 and their potential contribution to domestication-associated traits in *B. mori*. Notably,  
105 the functions of domestication candidate genes have been tested by reverse genetics  
106 approaches in *B. mori* (Xiang *et al.* 2018) but these approaches, to our knowledge, have  
107 not yet been implemented in *B. mandarina*.

108           Here we use CRISPR/Cas9-targeted knockouts of two candidate pigmentation  
109 genes in two distinct contexts. First, we demonstrate the feasibility of CRISPR/Cas9-  
110 targeted knockouts in *B. mandarina* by generating a homozygous *yellow-y* knockout  
111 strain. Next, to circumvent the lethal effects of knocking out a second candidate gene,  
112 *apt-like*, we use *allele-specific* CRISPR/Cas9-targeted knockouts in *B. mori* × *B.*  
113 *mandarina* F<sub>1</sub> hybrids. The latter experiment also comprises a test (the “reciprocal

114 hemizyosity test”, Steinmetz *et al.* 2002, Stern 2014) of the contribution of *apt-like*  
115 evolution to the domestication-associated loss of pigmentation in *B. mori*.

116

## 117 **Results and discussion**

### 118 **A CRISPR/Cas9-targeted knockout of *yellow-y* in *B. mandarina*.**

119 To demonstrate the feasibility of CRISPR/Cas9-targeted knockouts in *B.*  
120 *mandarina*, we focused on known pigmentation-related genes. *TH* is among the most  
121 compelling candidate genes in the melanin synthesis pathway that seems likely to  
122 underlie domestication-associated loss of pigmentation in *B. mori* (Yu *et al.* 2011, Xiang  
123 *et al.* 2018). However, *TH* knockout mutants are predicted to be lethal (Neckameyer and  
124 White 1993, Liu *et al.* 2010), rendering them difficult to study. Thus, we decided to  
125 target *yellow-y* (Figure 1B), a melanin synthesis gene that is downstream of *TH* and  
126 functions in melanin synthesis in wide range of insects including *B. mori* and other  
127 Lepidoptera and is predicted to be non-essential (Futahashi *et al.* 2008, Zhang *et al.* 2017,  
128 Chen *et al.* 2018, Matsuoka and Monteiro 2018, Liu *et al.* 2020, Wang, Huang, *et al.*  
129 2020, Han *et al.* 2021, Shirai *et al.* 2021). After confirming the coding sequence  
130 annotation (CDS) of the *B. mandarina yellow-y* gene, we designed a unique CRISPR-  
131 RNA (crRNA) target site in exon 2 (Figure 2A, Table S1).

132 In *B. mori*, CRISPR/Cas9-targeted genome editing requires microinjection into  
133 non-diapausing eggs (Kanda and Tamura 1994). We obtained non-diapausing eggs by  
134 rearing *B. mandarina* larvae under 16 h-light/8 h-dark conditions (Kobayashi 1990). We  
135 then injected a mixture of crRNA, trans-activating crRNA (tracrRNA), and Cas9 into

136 336 *B. mandarina* embryos. Among 16 hatched larvae ( $G_0$  generation), nine grew to  
137 adult moths (Table 1). We crossed six  $G_0$  adults with wild-type moths and obtained  
138 generation 1 ( $G_1$ ) eggs. Using a heteroduplex mobility assay on the PCR products from  
139  $G_1$  embryos, we confirmed that mutations were introduced at the target site in five of the  
140 six  $G_1$  broods (Table 1, Figure S1), showing that CRISPR/Cas9-induced mutations of  
141 *yellow-y* were heritable. We then crossed  $G_1$  siblings with each other and obtained  
142 *yellow-y* homozygous knockout individuals carrying a five-nucleotide deletion followed  
143 by a single-nucleotide substitution (Figure 2B), which results in a frame-shift and  
144 premature stop codon. We designated this mutant allele *yellow-y*<sup>Δ5</sup> and used it for further  
145 analyses.

146 *B. mandarina yellow-y*<sup>Δ5</sup> homozygotes hatched normally and their development  
147 was comparable to that of wild-type individuals (Figure 3). In homozygous *yellow-y*<sup>Δ5</sup>  
148 neonate larvae, the larval integument and the head capsule are reddish brown instead of  
149 the normal black (Figure 3A) and in final instar larvae, spots and dorsal pigmentation  
150 patterns are lighter than that of the wild type (Figure 3B). Later in development, the  
151 pupal integument of homozygous *yellow-y*<sup>Δ5</sup> mutants exhibits reddish color instead of  
152 the normal black (Figure 3C), and the body and wing spot markings of *yellow-y*<sup>Δ5</sup> adult  
153 moths are lighter than that of wild-type (Figure 3D). Further, the phenotypes of  
154 heterozygous *+/yellow-y*<sup>Δ5</sup> individuals were comparable to that of wild type (data not  
155 shown). Together, these observations suggest that, as observed in *B. mori* (Futahashi *et*  
156 *al.* 2008), *yellow-y* is a non-essential gene contributing to melanin pigment synthesis in  
157 *B. mandarina* and loss-of-function is recessive.

158 Comparative data from other species suggests that *yellow-y* functions  
159 differently among lepidopteran species. For example, while *yellow-y* loss-of-function is  
160 also found to be recessive in several other lepidopteran species (Liu *et al.* 2020, Wang,  
161 Huang, *et al.* 2020, Han *et al.* 2021, Shirai *et al.* 2021), it is dominant in the black  
162 cutworm, *Agrotis ipsilon* (Chen *et al.* 2018). Further, unlike *Bombyx*, *yellow-y*  
163 knockouts in *Agrotis* are susceptible to dehydration (Chen *et al.* 2018) and mutants in  
164 *Spodoptera* exhibit defects in body development, copulation, oviposition, and  
165 hatchability (Liu *et al.* 2020, Han *et al.* 2021, Shirai *et al.* 2021). These observations  
166 suggest that although the function of *yellow-y* in melanin synthesis is conserved,  
167 additional *yellow-y* functions might be diverged among lepidopteran species. *yellow*  
168 genes are a rapidly evolving gene family, and loss or duplication of some *yellow* genes  
169 have been observed in Lepidoptera (Chen *et al.* 2018, Liu *et al.* 2020, Han *et al.* 2021,  
170 Shirai *et al.* 2021). It is possible that functions of *yellow-y* outside of melanin synthesis  
171 in *Bombyx* are compensated for by other *yellow* paralogs. In Lepidoptera, the function  
172 of most *yellow* genes remained unknown except for *yellow-y* (Futahashi *et al.* 2008,  
173 Zhang *et al.* 2017, Chen *et al.* 2018, Matsuoka and Monteiro 2018, Liu *et al.* 2020, Wang,  
174 Huang, *et al.* 2020, Han *et al.* 2021, Shirai *et al.* 2021), *yellow-e* (Ito *et al.* 2010), *yellow-*  
175 *d* (Zhang *et al.* 2017) and *yellow-h2/3* (Zhang *et al.* 2017). Further studies of *yellow*  
176 genes including *yellow-y* in diverse insect species are required to understand the  
177 functions and evolution of *yellow* paralogs.

178 While our results demonstrate the feasibility of genome editing in *B. mandarina*,  
179 these experiments are challenging due to low post-injection hatchability rates (4.8% in

180 our experiment). A recent study showed that the hatchability of *B. mandarina* eggs is  
181 generally lower than *B. mori* eggs, even under normal conditions (Zhu *et al.* 2019). To  
182 compare the hatchability of *B. mori* and *B. mandarina* embryos after injection, we  
183 injected three commonly used buffers (see Methods) and distilled water into embryos of  
184 both species and compared hatching rates. We found that the post-injection hatchability  
185 of *B. mandarina* embryos (0–8.3 %) is substantially lower than that of *B. mori* (22.9–  
186 62.5 %) in all experimental conditions (Table 2), suggesting that *B. mandarina* embryos  
187 are more sensitive to injection.

188

#### 189 ***Allele-specific knockouts of apt-like in interspecific F<sub>1</sub> hybrids.***

190 Knockouts of some pigmentation pathway genes, such as *apt-like* and *TH*, are  
191 predicted to be lethal (Neckameyer and White 1993, Eulenberg and Schuh 1997, Gellon  
192 *et al.* 1997, Liu *et al.* 2010, Yoda *et al.* 2014). Considering this obstacle to the study of  
193 essential genes, together with the observation (above) of reduced hatchability of injected  
194 *B. mandarina* embryos, we instead opted for the alternative strategy of injecting *B. mori*  
195 × *B. mandarina* F<sub>1</sub> hybrids. Specifically, we conducted an *allele-specific* CRISPR/Cas9-  
196 targeted knockout of *apt-like* in F<sub>1</sub> embryos (from crosses between *B. mori* females and  
197 *B. mandarina* males). We reasoned that, because the components of these F<sub>1</sub> eggs is  
198 derived from the *B. mori* mother, these embryos should have post-injection hatchability  
199 similar to that of *B. mori*. We designed species-specific crRNA targeting *apt-like*, for  
200 which the targeted protospacer adjacent motif (PAM) sequence is only present in either  
201 *B. mori*- or *B. mandarina*-derived sequence (Methods, Figure 4, Table S1). For each

202 targeted allele, we injected a mixture of crRNA, tracrRNA and Cas9 into 48 F<sub>1</sub> embryos.  
203 To confirm that mutations were specifically introduced into the targeted allele, we  
204 extracted genomic DNA from adult legs and PCR-amplified the target sites. We then  
205 carried out heteroduplex mobility assays using a microchip electrophoresis system (Ota  
206 *et al.* 2013, Ansai *et al.* 2014), which show that various mutations were introduced into  
207 the *apt-like* target sequence in both of the *allele-specific* knockout series (Figure S2).  
208 The PCR products obtained from two representative individuals of each *allele-specific*  
209 knockout series were then cloned and sequenced (Figure 4). The sequences of cloned  
210 PCR products confirmed that various mutations were introduced into the target sites in  
211 both knockout series, some of which cause frameshifts and associated premature stop  
212 codons. All mutations detected in this experiment were specifically introduced only into  
213 the targeted allele.

214 In addition to spots, normal F<sub>1</sub> larvae have a dark body with darker greyish  
215 brown banding covering wide range of the dorsal surface, similar to the pattern for *B.*  
216 *mandarina* (Figure 1A, Figure S3). As predicted, post-injection hatchability of F<sub>1</sub>  
217 embryos was high whether targeting the *B. mori* (60%) or the *B. mandarina* (66%)  
218 allele. In the *apt-like* knockout series targeting the *B. mori* allele, all of the 26 larvae that  
219 survived to the fifth instar stage exhibited normal body color (Table 3, Figure 5). In  
220 contrast, for the *apt-like* knockout series targeting the *B. mandarina* allele, 24 of the 29  
221 larvae that survived to the fifth instar stage exhibited white patches on dorsal  
222 pigmentation pattern banding that varied in size (Table 3, Figure 5, Figure S4). This  
223 result establishes a role for *apt-like* in body pigment formation and that the *B.*

224 *mandarina*-derived *apt-like* allele is dominant with respect to this trait. Notably,  
225 however, the pigmentation of F<sub>1</sub> pupae and adult stages of the knockout series targeting  
226 the *B. mori* or the *B. mandarina* allele both exhibited normal body color (data not shown).  
227 Additionally, larval spots, which are also predicted to be controlled by *apt-like* (Yoda *et*  
228 *al.* 2014), were also not affected the F<sub>1</sub> series targeting either the *B. mori* or the *B.*  
229 *mandarina* allele (Figure 5, Figure S4). Since both wild-type (+<sup>p</sup>) *B. mori* and *B.*  
230 *mandarina* larvae exhibit spots (Figure 1A), we conclude that the *B. mori* or the *B.*  
231 *mandarina*-derived *apt-like* alleles are both sufficient to direct the formation of larval  
232 spots.

233 Our results have implications beyond merely confirming a role for *apt-like* in  
234 *B. mandarina* larval pigmentation. The *allele-specific* knockouts of *apt-like* in F<sub>1</sub> hybrids  
235 allows us to compare the phenotype of genetically identical hybrids that differ only at  
236 the target locus (a framework called the “reciprocal hemizyosity test”, Steinmetz *et al.*  
237 2002, Stern 2014). As such, we can attribute the loss of pigmentation in the series  
238 targeting the *B. mandarina* allele to evolution at the *apt-like* gene in *B. mori*, rather than  
239 exclusively at a *trans*-acting factor. The Apt-like proteins of *B. mori* (p50T) and *B.*  
240 *mandarina* (Sakado) differ by only one amino acid substitution: Alanine to Valine at  
241 residue 188 (see DDBJ accession numbers LC706749 and LC706750). However, this  
242 substitution is not observed in *B. mandarina* collected at different locations (see NCBI  
243 accession numbers SRR6111377, SRR6111379, SRR6111381 and SRR6111382),  
244 suggesting this is not a fixed amino acid difference between species. This implies that



245 evolution of an *apt-like cis*-regulatory element contributes to the observed phenotypic  
246 difference between species.

247

## 248 **Conclusion**

249 Here we demonstrate the utility of CRISPR/cas9 genome editing in *B.*  
250 *mandarina* and *B. mori* × *B. mandarina* F<sub>1</sub> hybrids to the study the function and  
251 evolution of domestication-associated candidate genes. Focusing on two pigmentation-  
252 related genes, we show that *apt-like* plays a role in larval body pigmentation patterning  
253 (Figure 5), whereas *yellow-y* plays a more general role in pigmentation that is not pattern  
254 dependent or specific to developmental life-stage (Figure 3B). These results are  
255 consistent with the proposed roles of Apt-like as a transcription factor responsible for  
256 larval color patterning, and Yellow-y as an enzyme in the melanin synthesis pathway  
257 under control of Apt-like (Futahashi *et al.* 2008, Yoda *et al.* 2014). Further, using the  
258 framework of the reciprocal hemizyosity test, we show that *apt-like* has evolved in *B.*  
259 *mori* in a way that has specifically reduced larval body pigmentation, without affecting  
260 the formation of larval spots or adult body pigmentation.

261 Despite being a powerful tool to study gene function and evolution, the *allele-*  
262 *specific* knockout approach has several limitations. First, it requires sequence variants  
263 distinguishing the parents of the F<sub>1</sub> hybrid that result in a PAM-site that is only present  
264 in one of two species, limiting the potential to design *allele-specific* targets. However,  
265 this limitation may be overcome by using Cas proteins that recognize different PAM-  
266 sites (Leenay and Beisel 2017). For example, while the *Streptococcus pyogenes* Cas9

267 (*SpCas9*) protein has been used here, the Cas12a, which recognizes a distinct PAM  
268 sequence, has also been implemented in *B. mori* (Dong *et al.* 2020). In addition, recent  
269 studies have reported that *SpCas9* can be modified to recognize alternative PAM  
270 sequences (Kleinstiver *et al.* 2015, 2016). A second limitation is that, given the  
271 mosaicism of knockouts in G<sub>0</sub> individuals, one cannot exclude the possibility of false-  
272 negative phenotyping results. The cleavage efficiency of the CRISPR/Cas9 system is  
273 affected by several features, such as the sequences of PAM-distal and PAM-proximal  
274 regions of the guide RNA, the genomic context of the targeted DNA, as well as GC-  
275 content and secondary structure of the guide RNA (Liu *et al.* 2016). To minimize this  
276 problem, one can screen a large number of G<sub>0</sub> individuals and confirm that mutations  
277 were introduced with high efficiency (as in [Figure 4](#) and [Figure S2](#)).

278         Despite these limitations, our results highlight several advantages of *allele-*  
279 *specific* knockouts in the F<sub>1</sub> over knockouts in *B. mandarina*. First, our results show that  
280 *B. mori* (female) × *B. mandarina* (male) F<sub>1</sub> embryos are substantially more tolerant to  
281 injection compared to *B. mandarina*. Second, *allele-specific* knockouts in the F<sub>1</sub> permit  
282 the study of essential genes (such as *apt-like*) at which knockouts are expected to be  
283 homozygous lethal and recessive with respect to the phenotype. Finally, *allele-specific*  
284 CRISPR/Cas9-targeted knockouts in F<sub>1</sub> hybrids have the added utility of identifying loci  
285 that have diverged in function between *B. mori* and *B. mandarina*, and contributing to  
286 domestication-related traits in *B. mori* using the framework of the reciprocal  
287 hemizyosity test. Thus, our study showcases the multifaceted utility of *allele-specific*  
288 knockouts in F<sub>1</sub> hybrids in the study of gene function and evolution.

## 289 **Experimental procedures**

### 290 **Insects**

291 The *B. mori* strain p50T, a single-paired descendant of individuals of strain p50  
292 (a derivative from Daizo;  
293 <https://shigen.nig.ac.jp/silkwormbase/ViewStrainDetail.do?name=p50>), is maintained  
294 at our laboratory. The *B. mandarina* strain, Sakado, was originally collected in Sakado-  
295 city, Saitama, Japan, in 1982. Since then, it has been maintained at our laboratory by  
296 sib-mating. All larvae were reared on fresh mulberry leaves or artificial diet (SilkMate  
297 PS, NOSAN) under continuous 12 h-light/12 h-dark conditions at 25 °C with the  
298 exceptions described below. For injections in to *B. mandarina* embryos, we obtained  
299 non-diapausing eggs by rearing *B. mandarina* larvae under continuous long-day  
300 conditions (16 h-light/8 h-dark) at 25 °C (Kobayashi 1990). We then collected eggs in  
301 crosses between emerged adults. To generate *B. mori* × *B. mandarina* F<sub>1</sub> hybrid  
302 embryos for injection, we first incubated *B. mori* eggs at 15 °C under continuous  
303 darkness (Kogure 1933). The hatched larvae were then reared under continuous 16 h-  
304 light/8 h-dark condition at 25 °C and females were crossed to *B. mandarina* males.

305

### 306 **Confirmation of the *yellow-y* and *apt-like* coding sequences in *B. mandarina*.**

307 Total RNA was extracted from the integument of fourth instar *B. mandarina*  
308 larvae using TRIzol (Thermo Fisher Scientific). Complementary DNA (cDNA) was  
309 reverse transcribed from total RNA using TaKaRa RNA PCR Kit (TaKaRa). Reverse  
310 transcriptase-PCR was performed using KOD One polymerase (TOYOBO). PCR

311 products were cloned into pGEM-T Easy Vector (Promega) and Sanger-sequenced  
312 using the FASMAC sequencing service (Kanagawa, Japan).

313

#### 314 **Knockout of *yellow-y* in *B. mandarina***

315 An unique crRNA target sequence in the *B. mori* genome was selected using  
316 CRISPRdirect (<https://crispr.dbcls.jp>) (Table S1) (Naito *et al.* 2015). The uniqueness  
317 of the target sequence in the *B. mandarina* genome was then confirmed by performing  
318 blastn at SilkBase (<http://silkbases.ab.a.u-tokyo.ac.jp>). A mixture of crRNA, tracrRNA  
319 and Cas9 Nuclease protein NLS (600 ng/ $\mu$ L; NIPPON GENE) in injection buffer (100  
320 mM KOAc, 2 mM Mg(OAc)<sub>2</sub>, 30 mM HEPES-KOH; pH 7.4) was injected into each  
321 embryo within 3 h after oviposition (Yamaguchi *et al.* 2011).

322 The injected embryos (G<sub>0</sub> generation) were incubated at 25 °C in a humidified  
323 Petri dish until hatching. Adult G<sub>0</sub> moths were crossed with wild-type *B. mandarina*,  
324 and G<sub>1</sub> eggs were obtained. To detect heritable CRISPR/Cas9-induced mutations, ten  
325 G<sub>1</sub> eggs were collected into one tube, and genomic DNA was prepared using the  
326 HotSHOT method (Truett *et al.* 2000). The region containing the target site of *yellow-y*  
327 crRNA was PCR-amplified using KOD One polymerase (TOYOBO). Mutations at the  
328 target site were detected by heteroduplex mobility assay using the MultiNA microchip  
329 electrophoresis system (SHIMAZU) with the DNA-500 reagent kit (Ota *et al.* 2013,  
330 Ansai *et al.* 2014).

331 Adult G<sub>1</sub> moths from broods with heritable CRISPR/Cas9-induced mutations were  
332 crossed with each other to obtain homozygous knockout mutants (G<sub>2</sub>). To confirm

333 CRISPR/Cas9-induced mutations, we prepared genomic DNA, PCR-amplified the  
334 target region and detected mutations as described above using G<sub>2</sub> adult moths. To  
335 determine the precise nature of insertions, deletions and substitutions, PCR products  
336 obtained from G<sub>2</sub> individuals were directly Sanger-sequenced using the FASMAC  
337 sequencing service (Kanagawa, Japan).

338

### 339 **Comparison of post-injection hatchability.**

340 Three commonly used buffers (injection buffer 1 (Yamaguchi *et al.* 2011),  
341 injection buffer 2 (Tamura *et al.* 2000), PBS buffer) and distilled water into embryos of  
342 *B. mori* or *B. mandarina* within 3 h after oviposition. The injected embryos were  
343 incubated at 25 °C in a humidified Petri dish until hatching.

344

### 345 ***Allele-specific gene knockouts in F<sub>1</sub> hybrids.***

346 A PAM sequence is necessary for target recognition and following DNA  
347 cleavage in CRISPR/Cas system (Hsu *et al.* 2013, Anders *et al.* 2014), and *SpCas9*,  
348 which we used in this study, recognizes 5'-NGG-3' as PAM. We specifically targeted  
349 *SpCas9* PAM-sites that differed in sequence between *B. mori* and *B. mandarina* ([Figure](#)  
350 [4, Table S1](#)), allowing *allele-specific* DNA cleavage and gene knockout (Courtney *et*  
351 *al.* 2015, Christie *et al.* 2017). A mixture of crRNA, tracrRNA and Cas9 was injected  
352 to F<sub>1</sub> embryos as described above. To evaluate CRISPR/Cas9 cleavage efficiency, we  
353 extracted genomic DNA from G<sub>0</sub> adult legs and PCR-amplified the target region as

354 described above. PCR products were cloned into pGEM-T Easy Vector and Sanger-  
355 sequenced using an ABI3130xl genetic analyzer (Applied Biosystems).

356

### 357 **Acknowledgements**

358 We are grateful to Katsuya Satta and Hisashi Tobita for assistance with the  
359 experiments. We are also grateful to Professor Susumu Katsuma for helpful discussions.

360 We thank the Institute for Sustainable Agro-ecosystem Services, The University of  
361 Tokyo, for facilitating the mulberry cultivation and the Biotron Facility at the  
362 University of Tokyo for rearing the silkworms. This work was supported by JSPS  
363 KAKENHI grant number JP20J22954 to KT and JP20H02997 to TK.

364

### 365 **Data Availability**

366 Full-length coding sequences of *B. mori yellow-y*, *B. mandarina yellow-y*, *B.*  
367 *mori apt-like* and *B. mandarina apt-like* are available on the DDBJ under accession  
368 numbers of LC706747, LC706748, LC706749 and LC706750, respectively.

369

### 370 **Author contributions**

371 KT, PA and TK designed the study. KT performed most of the experiments. KT  
372 wrote the manuscript with intellectual input from TK and PA. All authors edited and  
373 approved the final version of the manuscript and agree to be accountable for all aspects  
374 of the work.

375

## 376 **References**

- 377 Anders, C., Niewoehner, O., Duerst, A., and Jinek, M., 2014. Structural basis of  
378 PAM-dependent target DNA recognition by the Cas9 endonuclease. *Nature*, 513  
379 (7519), 569–573.
- 380 Ansai, S., Inohaya, K., Yoshiura, Y., Scharfl, M., Uemura, N., Takahashi, R., and  
381 Kinoshita, M., 2014. Design, evaluation, and screening methods for efficient  
382 targeted mutagenesis with transcription activator-like effector nucleases in  
383 medaka. *Development, Growth & Differentiation*, 56 (1), 98–107.
- 384 Chen, X., Cao, Y., Zhan, S., Zhang, Y., Tan, A., and Huang, Y., 2018. Identification  
385 of *yellow* gene family in *Agrotis ipsilon* and functional analysis of *Aiyellow-y* by  
386 CRISPR/Cas9. *Insect Biochemistry and Molecular Biology*, 94, 1–9.
- 387 Christie, K.A., Courtney, D.G., DeDionisio, L.A., Shern, C.C., De Majumdar, S.,  
388 Mairs, L.C., Nesbit, M.A., and Moore, C.B.T., 2017. Towards personalised  
389 allele-specific CRISPR gene editing to treat autosomal dominant disorders.  
390 *Scientific Reports*, 7 (1), 16174.
- 391 Courtney, D.G., Moore, J.E., Atkinson, S.D., Maurizi, E., Allen, E.H.A., Pedrioli,  
392 D.M.L., McLean, W.H.I., Nesbit, M.A., and Moore, C.B.T., 2015. CRISPR/Cas9  
393 DNA cleavage at SNP-derived PAM enables both *in vitro* and *in vivo* *KRT12*  
394 mutation-specific targeting. *Gene Therapy*, 23 (1), 108–112.
- 395 Dong, Z., Qin, Q., Hu, Z., Zhang, X., Miao, J., Huang, L., Chen, P., Lu, C., and Pan,  
396 M., 2020. CRISPR/Cas12a mediated genome editing enhances *Bombyx mori*  
397 resistance to BmNPV. *Frontiers in Bioengineering and Biotechnology*, 8, 841.

- 398 Eulenberg, K.G. and Schuh, R., 1997. The tracheae defective gene encodes a bZIP  
399 protein that controls tracheal cell movement during *Drosophila* embryogenesis.  
400 *The EMBO Journal*, 16 (23), 7156–7165.
- 401 Fang, S., Zhou, Q., Yu, Q., and Zhang, Z., 2020. Genetic and genomic analysis for  
402 cocoon yield traits in silkworm. *Scientific Reports*, 10 (1), 5682.
- 403 Fujii, T., Kiuchi, T., Daimon, T., Ito, K., Katsuma, S., Shimada, T., Yamamoto, K.,  
404 and Banno, Y., 2021. Development of interspecific semiconsomic strains  
405 between the domesticated silkworm, *Bombyx mori* and the wild silkworm, *B.*  
406 *mandarina*. *Journal of Insect Biotechnology and Sericology*, 90 (2), 33–40.
- 407 Futahashi, R., Sato, J., Meng, Y., Okamoto, S., Daimon, T., Yamamoto, K., Suetsugu,  
408 Y., Narukawa, J., Takahashi, H., Banno, Y., Katsuma, S., Shimada, T., Mita, K.,  
409 and Fujiwara, H., 2008. *yellow* and *ebony* are the responsible genes for the larval  
410 color mutants of the silkworm *Bombyx mori*. *Genetics*, 180 (4), 1995–2005.
- 411 Gellon, G., Harding, K.W., McGinnis, N., Martin, M.M., and McGinnis, W., 1997. A  
412 genetic screen for modifiers of deformed homeotic function identifies novel  
413 genes required for head development. *Development*, 124 (17), 3321–3331.
- 414 Han, W., Tang, F., Zhong, Y., Zhang, J., and Liu, Z., 2021. Identification of *yellow*  
415 gene family and functional analysis of *Spodoptera frugiperda yellow-y* by  
416 CRISPR/Cas9. *Pesticide Biochemistry and Physiology*, 178, 104937.
- 417 Hsu, P.D., Scott, D.A., Weinstein, J.A., Ran, F.A., Konermann, S., Agarwala, V., Li,  
418 Y., Fine, E.J., Wu, X., Shalem, O., Cradick, T.J., Marraffini, L.A., Bao, G., and



- 419 Zhang, F., 2013. DNA targeting specificity of RNA-guided Cas9 nucleases.  
420 *Nature Biotechnology*, 31 (9), 827–832.
- 421 Ito, K., Katsuma, S., Yamamoto, K., Kadono-Okuda, K., Mita, K., and Shimada, T.,  
422 2010. Yellow-e determines the color pattern of larval head and tail spots of the  
423 silkworm *Bombyx mori*. *Journal of Biological Chemistry*, 285 (8), 5624–5629.
- 424 Kanda, T. and Tamura, T., 1994. Microinjection method for DNA in early embryos of  
425 the silkworm, *Bombyx mori*, using air-pressure. *Bulletin of the National Institute*  
426 *of Sericultural and Entomological Science*, 2, 31–46 (in Japanese with English  
427 summary).
- 428 Kleinstiver, B.P., Pattanayak, V., Prew, M.S., Tsai, S.Q., Nguyen, N.T., Zheng, Z.,  
429 and Joung, J.K., 2016. High-fidelity CRISPR–Cas9 nucleases with no detectable  
430 genome-wide off-target effects. *Nature*, 529 (7587), 490–495.
- 431 Kleinstiver, B.P., Prew, M.S., Tsai, S.Q., Topkar, V. V., Nguyen, N.T., Zheng, Z.,  
432 Gonzales, A.P.W., Li, Z., Peterson, R.T., Yeh, J.-R.J., Aryee, M.J., and Joung,  
433 J.K., 2015. Engineered CRISPR-Cas9 nucleases with altered PAM specificities.  
434 *Nature*, 523 (7561), 481–485.
- 435 Kobayashi, J., 1990. Effects of photoperiod on the induction of egg diapause of  
436 tropical races of the domestic silkworm, *Bombyx mori*, and the wild silkworm, *B.*  
437 *mandarina*. *Japan Agricultural Research Quarterly*, 23 (3), 202–205.
- 438 Kogure, M., 1933. The influence of light and temperature on certain characters of the  
439 silkworm, *Bombyx mori*. *Journal of the Faculty of Agriculture, Kyushu*  
440 *University*, 4 (1), 1–93.

- 441 Leenay, R.T. and Beisel, C.L., 2017. Deciphering, communicating, and engineering  
442 the CRISPR PAM. *Journal of Molecular Biology*, 429 (2), 177–191.
- 443 Li, C., Tong, X., Zuo, W., Luan, Y., Gao, R., Han, M., Xiong, G., Gai, T., Hu, H.,  
444 Dai, F., and Lu, C., 2017. QTL analysis of cocoon shell weight identifies  
445 *BmRPL18* associated with silk protein synthesis in silkworm by pooling  
446 sequencing. *Scientific Reports*, 7 (1), 17985.
- 447 Liu, C., Yamamoto, K., Cheng, T.C., Kadono-Okuda, K., Narukawa, J., Liu, S.P.,  
448 Han, Y., Futahashi, R., Kidokoro, K., Noda, H., Kobayashi, I., Tamura, T.,  
449 Ohnuma, A., Banno, Y., Dai, F.Y., Xiang, Z.H., Goldsmith, M.R., Mita, K., and  
450 Xia, Q.Y., 2010. Repression of *tyrosine hydroxylase* is responsible for the *sex-*  
451 *linked chocolate* mutation of the silkworm, *Bombyx mori*. *Proceedings of the*  
452 *National Academy of Sciences of the United States of America*, 107 (29), 12980–  
453 12985.
- 454 Liu, X., Han, W., Ze, L., Peng, Y., Yang, Y., Zhang, J., Yan, Q., and Dong, S., 2020.  
455 Clustered regularly interspaced short palindromic repeats/CRISPR-associated  
456 protein 9 mediated knockout reveals functions of the *yellow-y* gene in  
457 *Spodoptera litura*. *Frontiers in Physiology*, 11, 1643.
- 458 Liu, X., Homma, A., Sayadi, J., Yang, S., Ohashi, J., and Takumi, T., 2016. Sequence  
459 features associated with the cleavage efficiency of CRISPR/Cas9 system.  
460 *Scientific Reports*, 6 (1), 19675.
- 461 Lu, K., Liang, S., Han, M., Wu, C., Song, J., Li, C., Wu, S., He, S., Ren, J., Hu, H.,  
462 Shen, J., Tong, X., and Dai, F., 2020. Flight muscle and wing mechanical

- 463 properties are involved in flightlessness of the domestic silkworm, *Bombyx mori*.  
464 *Insects*, 11 (4), 220.
- 465 Matsuoka, Y. and Monteiro, A., 2018. Melanin pathway genes regulate color and  
466 morphology of butterfly wing scales. *Cell reports*, 24 (1), 56–65.
- 467 Naito, Y., Hino, K., Bono, H., and Ui-Tei, K., 2015. CRISPRdirect: software for  
468 designing CRISPR/Cas guide RNA with reduced off-target sites. *Bioinformatics*,  
469 31 (7), 1120–1123.
- 470 Neckameyer, W.S. and White, K., 1993. *Drosophila* Tyrosine hydroxylase is encoded  
471 by the *pale* locus. *Journal of Neurogenetics*, 8 (4), 189–199.
- 472 Ômura, S., 1950. Researches on the behavior and ecological characteristics of the  
473 wild silkworm *Bombyx mandarina*. *Bulletin of the Imperial Sericultural*  
474 *Experiment Station*, 13 (3), 79-130 (in japanese with English summary).
- 475 Ota, S., Hisano, Y., Muraki, M., Hoshijima, K., Dahlem, T.J., Grunwald, D.J., Okada,  
476 Y., and Kawahara, A., 2013. Efficient identification of TALEN-mediated  
477 genome modifications using heteroduplex mobility assays. *Genes to Cells*, 18  
478 (6), 450–458.
- 479 Quan, G.-X., Kim, I., Kômoto, N., Sezutsu, H., Ote, M., Shimada, T., Kanda, T.,  
480 Mita, K., Kobayashi, M., and Tamura, T., 2002. Characterization of the  
481 kynurenine 3-monooxygenase gene corresponding to the *white egg 1* mutant in  
482 the silkworm *Bombyx mori*. *Molecular Genetics and Genomics*, 267 (1), 1–9.

- 483 Shirai, Y., Ohde, T., and Daimon, T., 2021. Functional conservation and  
484 diversification of *yellow-y* in lepidopteran insects. *Insect Biochemistry and*  
485 *Molecular Biology*, 128, 103515.
- 486 Steinmetz, L.M., Sinha, H., Richards, D.R., Spiegelman, J.I., Oefner, P.J., McCusker,  
487 J.H., and Davis, R.W., 2002. Dissecting the architecture of a quantitative trait  
488 locus in yeast. *Nature*, 416 (6878), 326–330.
- 489 Stern, D.L., 2014. Identification of loci that cause phenotypic variation in diverse  
490 species with the reciprocal hemizyosity test. *Trends in Genetics*, 30 (12), 547–  
491 554.
- 492 Takasu, Y., Kobayashi, I., Beumer, K., Uchino, K., Sezutsu, H., Sajwan, S., Carroll,  
493 D., Tamura, T., and Zurovec, M., 2010. Targeted mutagenesis in the silkworm  
494 *Bombyx mori* using zinc finger nuclease mRNA injection. *Insect Biochemistry*  
495 *and Molecular Biology*, 40 (10), 759–765.
- 496 Takasu, Y., Sajwan, S., Daimon, T., Osanai-Futahashi, M., Uchino, K., Sezutsu, H.,  
497 Tamura, T., and Zurovec, M., 2013. Efficient TALEN construction for *Bombyx*  
498 *mori* gene targeting. *PLoS ONE*, 8 (9), e73458.
- 499 Tamura, T., Thibert, C., Royer, C., Kanda, T., Eappen, A., Kamba, M., Kômoto, N.,  
500 Thomas, J.-L., Mauchamp, B., Chavancy, G., Shirk, P., Fraser, M., Prudhomme,  
501 J.-C., and Couble, P., 2000. Germline transformation of the silkworm *Bombyx*  
502 *mori* L. using a *piggyBac* transposon-derived vector. *Nature Biotechnology*, 18  
503 (1), 81–84.

- 504 Truett, G.E., Heeger, P.S., Mynatt, R.L., Truett, A.A., Walker, J.A., and Warman,  
505 M.L., 2000. Preparation of PCR-quality mouse genomic DNA with hot sodium  
506 hydroxide and tris (HotSHOT). *Biotechniques*, 29 (1), 52–54.
- 507 Wang, M., Lin, Y., Zhou, S., Cui, Y., Feng, Q., Yan, W., and Xiang, H., 2020.  
508 Genetic mapping of climbing and mimicry: two behavioral traits degraded  
509 during silkworm domestication. *Frontiers in Genetics*, 11, 1568.
- 510 Wang, Y., Huang, Y., Xu, X., Liu, Z., Li, J., Zhan, X., Yang, G., You, M., and You,  
511 S., 2020. CRISPR/Cas9-based functional analysis of *yellow* gene in the  
512 diamondback moth, *Plutella xylostella*. *Insect Science*, 28 (5), 1504–1509.
- 513 Wang, Y., Li, Z., Xu, J., Zeng, B., Ling, L., You, L., Chen, Y., Huang, Y., and Tan,  
514 A., 2013. The CRISPR/Cas System mediates efficient genome engineering in  
515 *Bombyx mori*. *Cell Research*, 23 (12), 1414–1416.
- 516 Wilkins, A.S., Wrangham, R.W., and Tecumseh Fitch, W., 2014. The “domestication  
517 syndrome” in mammals: a unified explanation based on neural crest cell  
518 behavior and genetics. *Genetics*, 197 (3), 795–808.
- 519 Xiang, H., Liu, X., Li, M., Zhu, Y., Wang, L., Cui, Y., Liu, L., Fang, G., Qian, H.,  
520 Xu, A., Wang, W., and Zhan, S., 2018. The evolutionary road from wild moth to  
521 domestic silkworm. *Nature Ecology & Evolution*, 2 (8), 1268–1279.
- 522 Yamaguchi, J., Mizoguchi, T., and Fujiwara, H., 2011. siRNAs induce efficient RNAi  
523 response in *Bombyx mori* embryos. *PLoS ONE*, 6 (9), e25469.

- 524 Yoda, S., Yamaguchi, J., Mita, K., Yamamoto, K., Banno, Y., Ando, T., Daimon, T.,  
525 and Fujiwara, H., 2014. The transcription factor Apontic-like controls diverse  
526 colouration pattern in caterpillars. *Nature Communications*, 5 (1), 4936.
- 527 Yu, H.-S., Shen, Y.-H., Yuan, G.-X., Hu, Y.-G., Xu, H.-E., Xiang, Z.-H., and Zhang,  
528 Z., 2011. Evidence of selection at melanin synthesis pathway loci during  
529 silkworm domestication. *Molecular Biology and Evolution*, 28 (6), 1785–1799.
- 530 Zhang, L., Martin, A., Perry, M.W., van der Burg, K.R.L., Matsuoka, Y., Monteiro,  
531 A., and Reed, R.D., 2017. Genetic basis of melanin pigmentation in butterfly  
532 wings. *Genetics*, 205 (4), 1537–1550.
- 533 Zhu, Y.N., Wang, L.Z., Li, C.C., Cui, Y., Wang, M., Lin, Y.J., Zhao, R.P., Wang, W.,  
534 and Xiang, H., 2019. Artificial selection on storage protein 1 possibly  
535 contributes to increase of hatchability during silkworm domestication. *PLOS*  
536 *Genetics*, 15 (1), e1007616.
- 537
- 538
- 539

540 **Figures and Tables**

541

542 **Table 1.** Efficiency of CRISPR/Cas9-targeted knockout in *B. mandarina* targeting

543 *yellow-y*.

| # eggs injected | # hatched larvae | # adults | # G <sub>1</sub> broods | # G <sub>1</sub> broods carrying mutant alleles |
|-----------------|------------------|----------|-------------------------|-------------------------------------------------|
| 336             | 16               | 9        | 6                       | 5                                               |

544

545

546 **Table 2.** The hatchability of *B. mori* and *B. mandarina* embryos injected with an  
547 injection buffer 1 (Yamaguchi *et al.* 2011), injection buffer 2 (Tamura *et al.* 2000), PBS  
548 buffer and distilled water.

| Treatment          | Composition                                                                                                       | <i>B. mori</i>  |                  | <i>B. mandarina</i> |                  |
|--------------------|-------------------------------------------------------------------------------------------------------------------|-----------------|------------------|---------------------|------------------|
|                    |                                                                                                                   | # injected eggs | # hatched larvae | # injected eggs     | # hatched larvae |
| Injection buffer 1 | 100 mM KOAc, 2 mM Mg(OAc) <sub>2</sub> , 30 mM HEPES-KOH; pH 7.4                                                  | 48              | 11               | 48                  | 0                |
| Injection buffer 2 | 0.5 mM phosphate buffer (pH 7.0), 5 mM KCl                                                                        | 48              | 30               | 48                  | 4                |
| PBS buffer         | 137 mM NaCl, 2.7 mM KCl, 10 mM Na <sub>2</sub> HPO <sub>4</sub> , 1.76mM KH <sub>2</sub> PO <sub>4</sub> ; pH 7.4 | 48              | 23               | 48                  | 1                |
| Distilled water    | –                                                                                                                 | 48              | 17               | 48                  | 2                |

549



550 **Table 3.** Efficiency of *allele-specific* knockouts of *apt-like* in F<sub>1</sub> hybrids.

| Targeted allele     | # eggs injected | # hatched larvae | # 5th instar larvae | # mosaic 5th instar larvae | # adults (male/female) |
|---------------------|-----------------|------------------|---------------------|----------------------------|------------------------|
| <i>B. mori</i>      | 48              | 29               | 26                  | 0                          | 26 (16/10)             |
| <i>B. mandarina</i> | 48              | 32               | 29                  | 24                         | 29 (18/11)             |

551

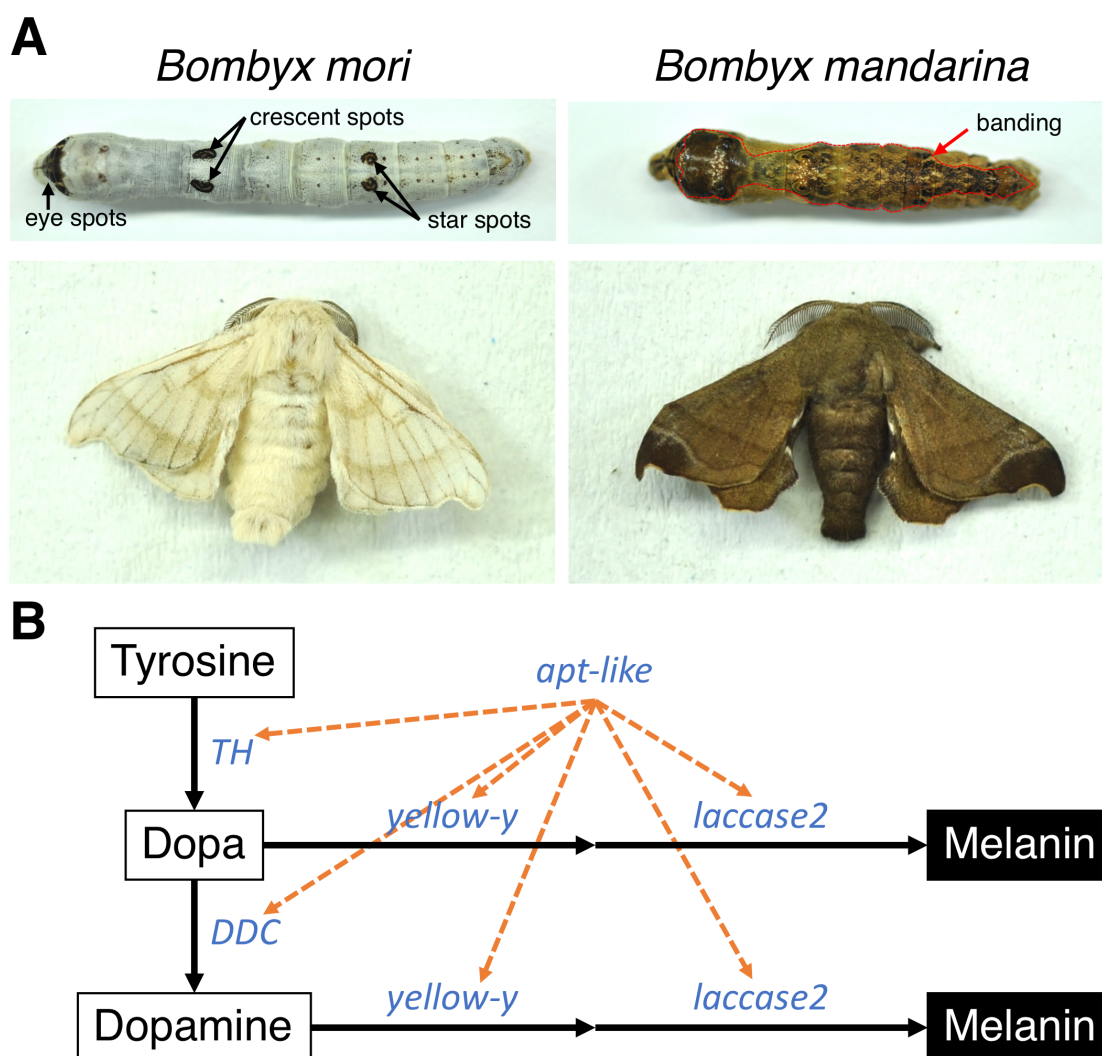

552

553 **Figure 1.** (A) Larvae (top) and adult males (bottom) of *B. mori* (left) and *B. mandarina*

554 (right). Black arrows indicate larval spot markings (eye spots, crescent spots and star

555 spots) and red dotted lines delimit the larval dorsal pigment patterning (“banding”).

556 The names of spots follow the nomenclature of Yoda *et al.* (2014). (B) The proposed

557 melanin biosynthesis pathway in *Bombyx* larvae largely adapted from Futahashi *et al.*

558 (2008) and Yoda *et al.* (2014). Orange dashed arrows indicate presumed regulation of

559 genes by the transcription factor *apt-like*.

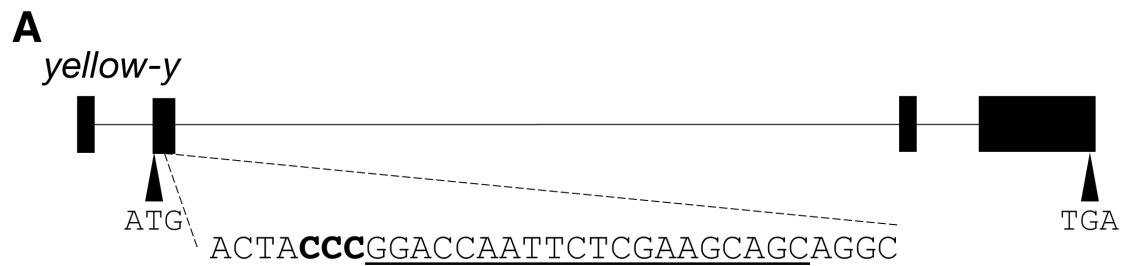

**B**

|                               | Trp | Asn | Tyr | Pro        | Asp | Gln | Phe | Ser | Lys | Gln | Gln | Ala | Leu | Arg | Thr | Gly |     |     |     |
|-------------------------------|-----|-----|-----|------------|-----|-----|-----|-----|-----|-----|-----|-----|-----|-----|-----|-----|-----|-----|-----|
| Wild type                     | TGG | AAC | TAC | <b>CCG</b> | GAC | CAG | TTC | TCG | AAG | CAG | CAG | GCT | CTC | AGG | ACT | GGT |     |     |     |
| <i>yellow-y</i> <sup>Δ5</sup> | TGG | AAC | TAC | CC-        | -   | -   | -   | -   | AA  | TTC | TCG | AAG | CAG | CAG | GCT | CTC | AGG | ACT | GGT |

560

561 **Figure 2.** The nature of the lesion in the *yellow-y* knockout (*yellow-y*<sup>Δ5</sup>) in *B. mandarina*.

562 (A) Gene structure of *yellow-y* and the selected crRNA target site. The target sequence

563 is underlined and the protospacer adjacent motif (PAM) site is shown in bold letters. (B)

564 Alignment of the *yellow-y* gene sequences surrounding the crRNA target site from wild

565 type, and G<sub>2</sub> *B. mandarina* individuals that are homozygous for a 5-base pair deletion

566 and associated single nucleotide mutation. The target sequence is underlined, and the

567 PAM site (CCN) is indicated in bold letters.

568

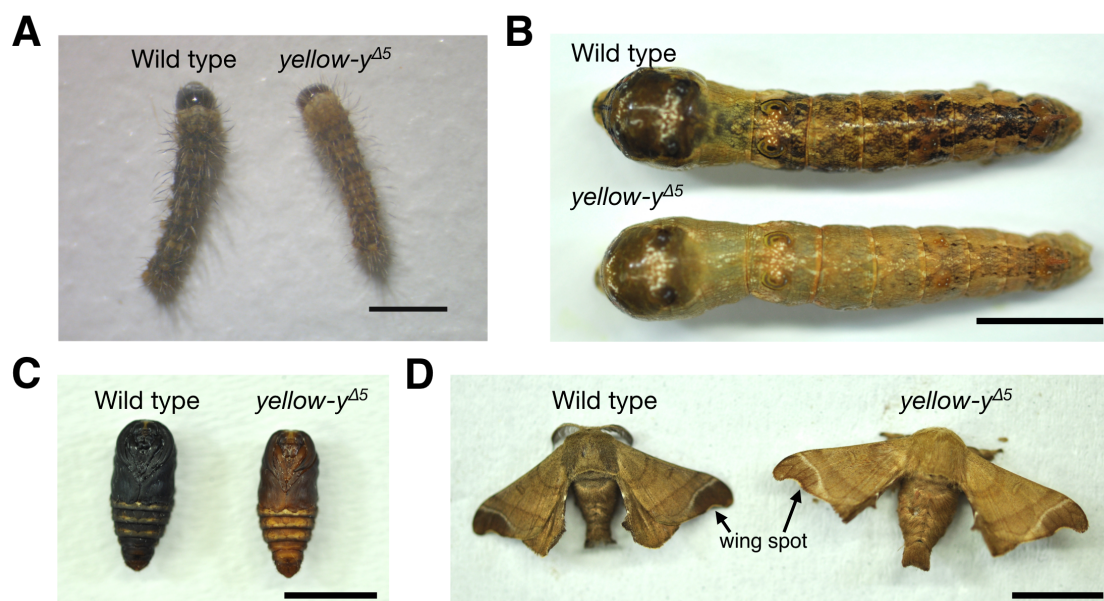

569

570 **Figure 3.** The phenotypes of wild-type and *yellow-y* knockout mutants of *B. mandarina*.

571 Representative (A) neonate larvae, (B) final-instar larvae, (C) male pupae and (D) adult

572 male moths of wild-type (left or top) and *yellow-y<sup>Δ5</sup>* (right or bottom) *B. mandarina*.

573 Arrows indicate wing spot markings in adult moths. Scale bars: 1 mm (A) or 1 cm (B-

574 D).

575

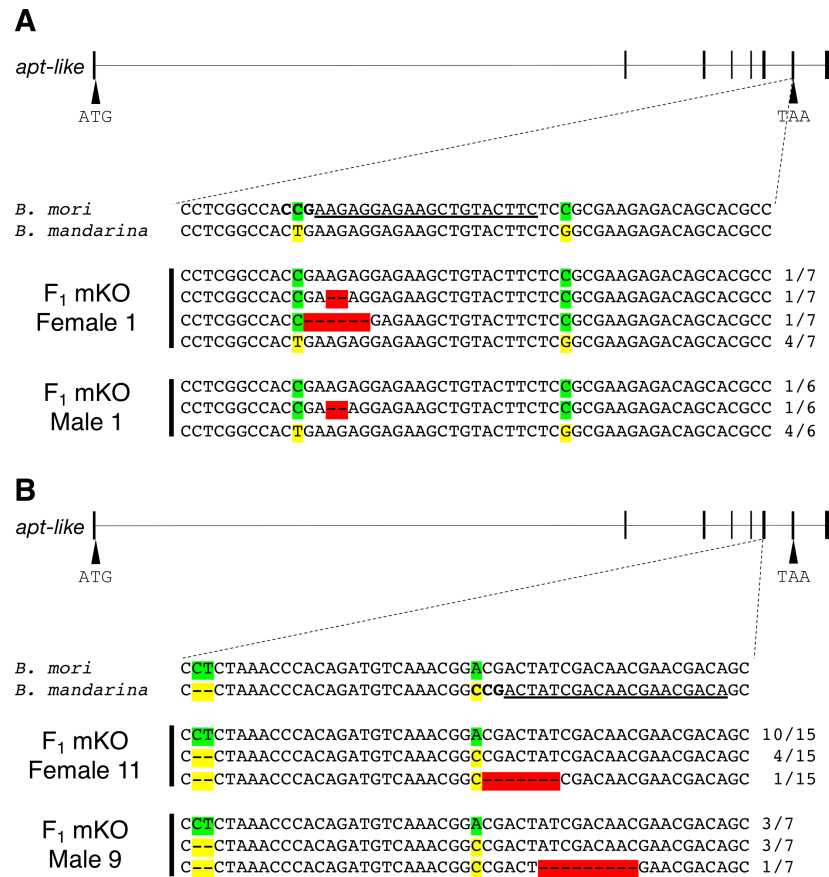

576

577 **Figure 4.** Mutations introduced by *allele-specific apt-like* mosaic knockout (mKO) in  
 578 F<sub>1</sub> hybrids. Annotation and inset alignments of the *apt-like* gene in both species with  
 579 selected crRNA target sites whose PAM sequences are only present in (A) *B. mori* or  
 580 (B) *B. mandarina*. Two *allele-specific* knockout individuals were sequenced for each  
 581 target. The target sequences are underlined, and the PAM sequences are shown in bold  
 582 letters. *B. mori* specific SNPs and *B. mandarina* specific single nucleotide variants are  
 583 highlighted with green and yellow shadings, respectively. Mutations introduced by  
 584 CRISPR/Cas9 system are highlighted with red shading. Numbers on the right edge  
 585 indicate the numbers of the clones identified among all cloned and sequenced PCR  
 586 products.

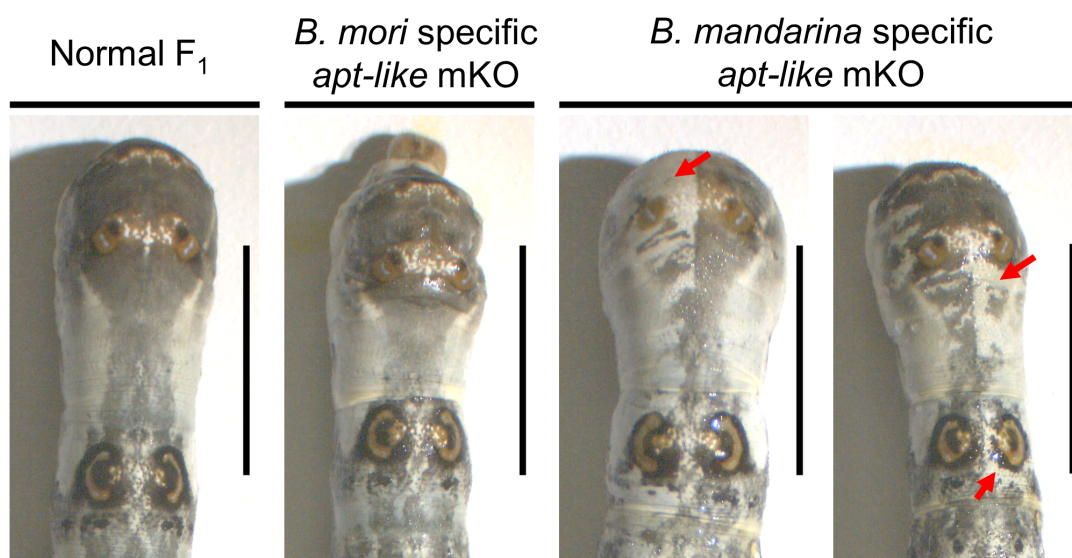

587

588 **Figure 5.** Representative fifth instar larvae of normal F<sub>1</sub> (left), *allele-specific apt-like*

589 mKOs targeting the *B. mori* allele (middle) and the *B. mandarina* allele (right). Red

590 arrows indicate ectopic white (depigmented) regions. Scale bars: 1 cm.

591

592 **Table S1** PCR primers and RNA sequences used in this study.

| Primer Name                   | Sequence                                                                                | Usage                                                                                   |
|-------------------------------|-----------------------------------------------------------------------------------------|-----------------------------------------------------------------------------------------|
| <b>PCR primers</b>            |                                                                                         |                                                                                         |
| yellow-y_cloning_F02          | AAGCTGCCGCGAACATAG                                                                      | RT-PCR and CDS cloning                                                                  |
| yellow-y_cloning_R02          | TGCAATAGAAAGCCTCACATTT                                                                  | RT-PCR and CDS cloning                                                                  |
| apt-like_cloning_F            | GAAAATAAGAGCCCACGCACT                                                                   | RT-PCR and CDS cloning                                                                  |
| apt-like_cloning_R            | ACTTGAATCCGCTTTTGACG                                                                    | RT-PCR and CDS cloning                                                                  |
| yellow-y_mid_F                | CGTCTTTGGGTATTAGACGTTGG                                                                 | CDS cloning                                                                             |
| yellow_y_check_F              | GTACATACCTGAGCGCCACCT                                                                   | Genomic PCR for mutation detection and sequencing in CRISPR/Cas9-targeted gene knockout |
| yellow_y_check_R              | CAGCAACGATAAAGCTCCAAG                                                                   | Genomic PCR for mutation detection and sequencing in CRISPR/Cas9-targeted gene knockout |
| Bmand_apt-like_F03            | GAGGTTTTGTGTGGCGAGATG                                                                   | Genomic PCR for mutation detection and sequencing in CRISPR/Cas9-targeted gene knockout |
| Bmand_apt-like_R02            | AGGAAGTTCTGCTGGAGTCTG                                                                   | Genomic PCR for mutation detection and sequencing in CRISPR/Cas9-targeted gene knockout |
| Bmori_apt-like_F01            | CTGGACGATCACATAAAGCAC                                                                   | Genomic PCR for mutation detection and sequencing in CRISPR/Cas9-targeted gene knockout |
| Bmori_apt-like_R01            | TCTCAACTCAATGAGGAACAGC                                                                  | Genomic PCR for mutation detection and sequencing in CRISPR/Cas9-targeted gene knockout |
| <b>RNAs</b>                   |                                                                                         |                                                                                         |
| yellow-y_crRNA_1              | GCUGCUUCGAGAAUUGGUCCGU<br>UUUAGAGCUAUGCUGUUUUG                                          | CRISPR/Cas9-targeted gene knockout                                                      |
| Bmori_apt-like_specific_crRNA | GAAGUACAGCUUCUCCUCUUGU<br>UUUAGAGCUAUGCUGUUUUG                                          | CRISPR/Cas9-targeted gene knockout                                                      |
| Bmand_apt-like_specific_crRNA | UGUCGUUCGUUGUCGAUAGUGU<br>UUUAGAGCUAUGCUGUUUUG                                          | CRISPR/Cas9-targeted gene knockout                                                      |
| tracrRNA                      | AAACAGCAUAGCAAGUUAAAAU<br>AAGGCUAGUCCGUUAUCAACUU<br>GAAAAAGUGGCACCGAGUCGGU<br>GCUUUUUUU | CRISPR/Cas9-targeted gene knockout                                                      |

593

594



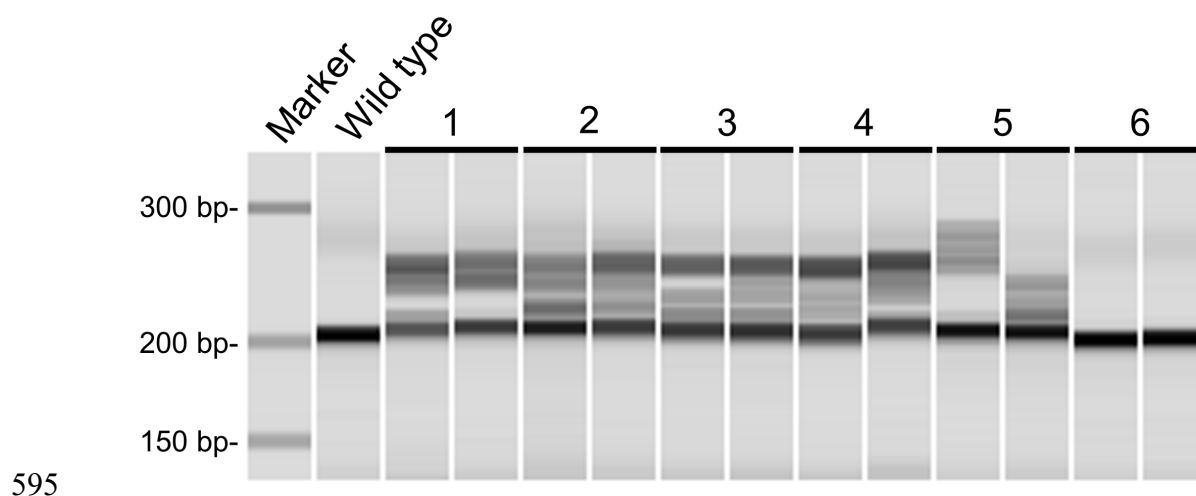

596 **Figure S1.** Detection of mutations at the *yellow-y* crRNA target site using a heteroduplex  
597 mobility shift assay. Two intervals were prepared for each G<sub>1</sub> brood. Ten eggs were  
598 collected into one tube, and genomic DNA was prepared. The region containing the  
599 target site of *yellow-y* crRNA was PCR-amplified. Multiple heteroduplex bands caused  
600 by insertion/deletion mismatches were observed indicating the presence of DNA lesions  
601 (insertions/deletions and/or associated nucleotide variants).

602



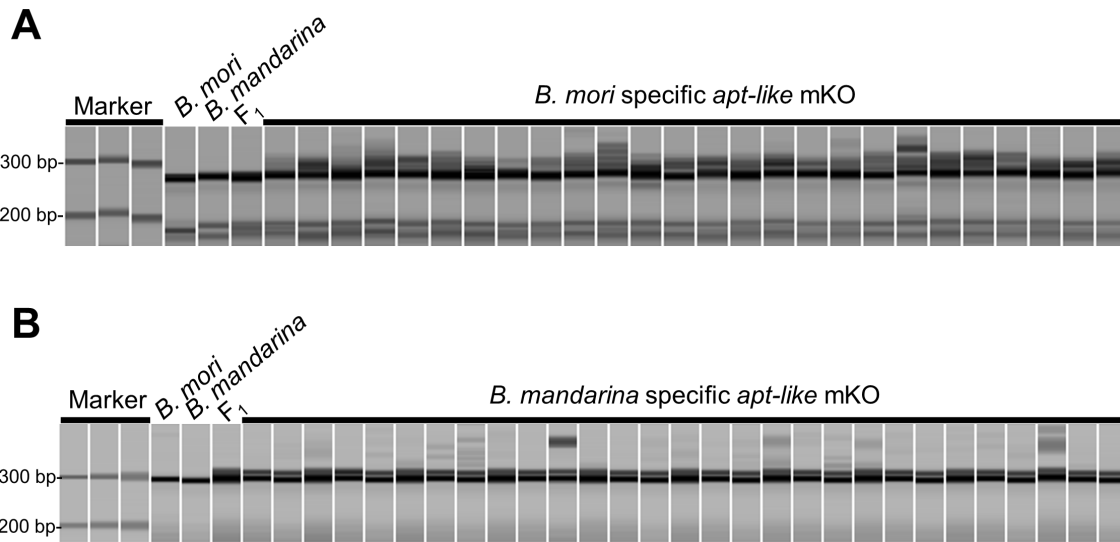

603

604

605 **Figure S2.** Detection of mutations at *apt-like* crRNA target sites using a heteroduplex

606 mobility shift assay. The region containing the target site of (A) *B. mori* specific *apt-*

607 *like* crRNA and (B) *B. mandarina* specific *apt-like* crRNA was PCR-amplified using

608 DNA prepared from G<sub>0</sub> adults' legs. Multiple heteroduplex bands caused by

609 insertion/deletion mismatches and associated nucleotide variants were observed in G<sub>0</sub>

610 mosaics.

611

612

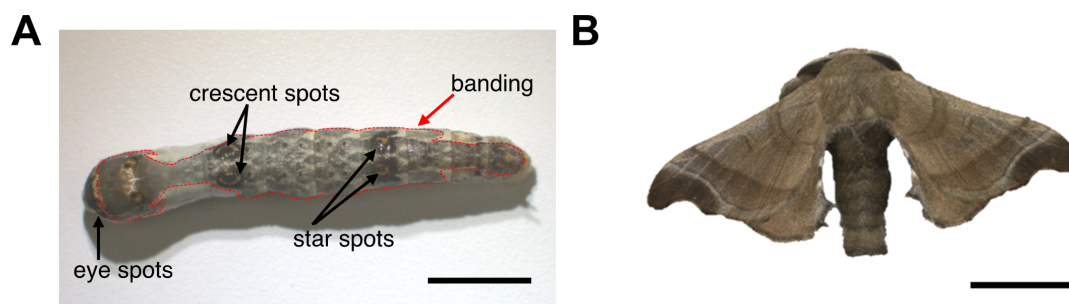

613

614 **Figure S3.** A representative (A) fifth instar larva and (B) adult male moth of normal F<sub>1</sub>

615 (*B. mori* female × *B. mandarina* male). Black arrows indicate larval spot markings and

616 red dotted lines outline the banding. Normal F<sub>1</sub> larvae have a dark body with darker

617 greyish brown banding covering wide range of the dorsal surface similar to *B.*

618 *mandarina*. The names of spots were referred to Yoda *et al.* (2014). Scale bars: 1 cm.

619

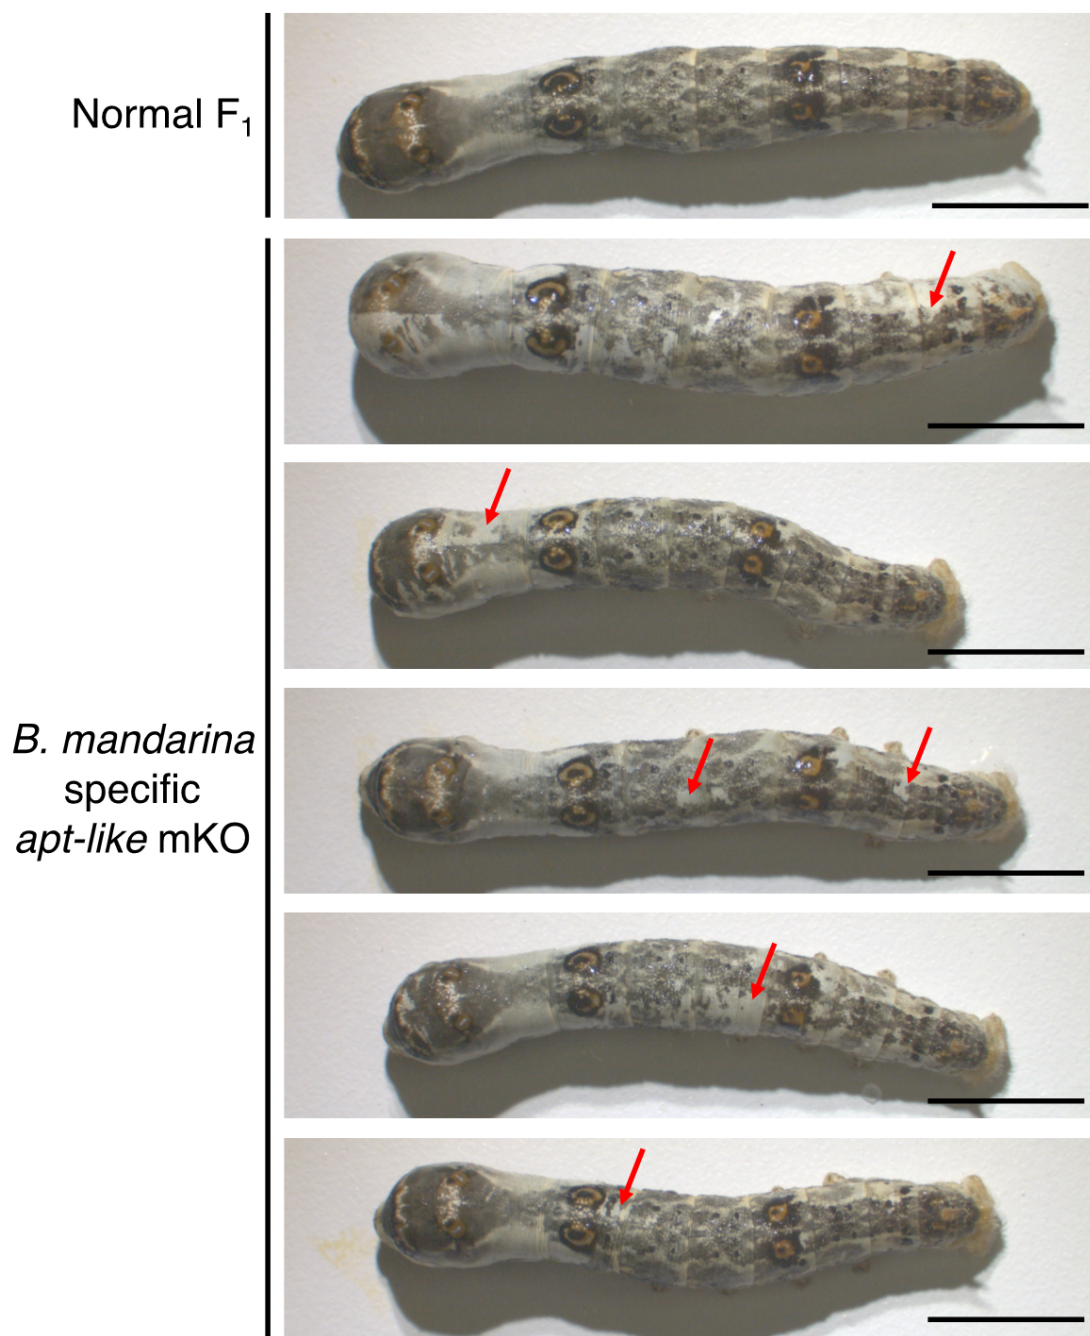

**Figure S4.** Fifth instar larvae of normal F<sub>1</sub> and *B. mandarina* specific *apt-like* mKO. Red arrows indicate ectopic white (depigmented) regions. Crescent and star spots were not depigmented in all larvae. Scale bars: 1 cm.
